# Supplementary material
Source: PubMed Central journal article supplement (PMC3749925)

**PPI chr11**

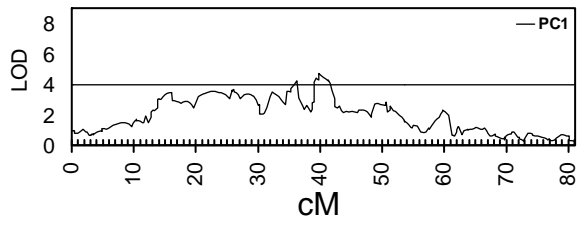

**PPI chr12**

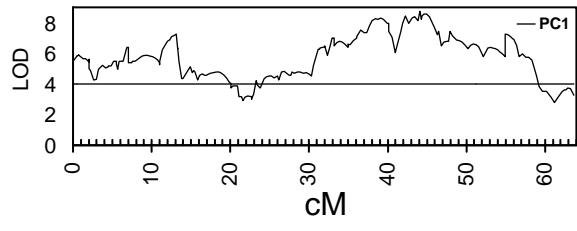

Supplement: NIHMS490035-supplement-Supp_Figure_S1.pdf [file NIHMS490035-supplement-Supp_Figure_S1.pdf]
